# Supplementary material
Source: publisher figshare collection journal article supplement (https://acs.figshare.com/ndownloader/files/5668617)
Supplement: Supplementary file 1 [file 5668617]

## Supporting Information

### Theoretical Understanding of Absorption-Based SPR Sensor Based on Kretschmann's Theory

Kazuyoshi Kurihara<sup>†</sup> and Koji Suzuki<sup>\*,†,‡</sup>

<sup>†</sup>*Kanagawa Academy of Science and Technology, 3-2-1 Sakado, Takatsu-ku, Kawasaki 213-0012, Japan*

<sup>‡</sup>*Department of Applied Chemistry, Keio University, 3-14-1 Hiyoshi, Kohoku-ku, Yokohama 223-8522, Japan*

#### Derivation of Eq 23

The Approximation of Eq 23 is described. In the usual SPR experiments,  $k'_0 > |k'_R|$  is satisfied so that Eq 21 is simplified to

$$n_p \frac{\omega}{c} \sin \theta_{\text{SPR}} \equiv k'_0, \quad (\text{S1})$$

where  $k'_0$  is given in Eq 19. When  $\epsilon'_s \gg \epsilon''_s$ ,  $|\epsilon'_m| \gg \epsilon''_m$  and  $|\epsilon'_m| \gg \epsilon'_s$ , Eq S1 is transferred to

$$\sin \theta_{\text{SPR}} \equiv \frac{n_s}{n_p} \sqrt{\frac{|\epsilon'_m|}{|\epsilon'_m| - n_s^2}} \equiv \frac{n_s}{n_p}, \quad (23)$$

where the complex refractive index  $n_s + i\kappa_s \equiv \sqrt{\epsilon_s}$  is used.

#### Derivation of Eq 25

The approximation of Eq 25 is described. Two approximations of  $k''_0$  and  $k''_R$  are required to estimate  $\eta$ . In the following calculations, we use the relation of  $n_s + i\kappa_s \equiv \sqrt{\epsilon_s}$  and assume that  $\epsilon'_s \gg \epsilon''_s$ ,  $|\epsilon'_m| \gg \epsilon''_m$  and  $|\epsilon'_m| \gg \epsilon'_s$ . Approximations of  $k''_0$  in Eq 19 are given by

$$\begin{aligned} k''_0 &\equiv \frac{\omega}{c} \sqrt{\epsilon'_s} \left( \frac{\epsilon'_s \epsilon''_m}{2\epsilon'^2_m} + \frac{\epsilon''_s}{2\epsilon'_s} - \frac{3\epsilon''_s}{4\epsilon'_m} \right) \\ &\equiv \frac{\omega}{c} \left\{ \frac{n_s^3 \epsilon''_m}{2\epsilon'^2_m} + \left( 1 + \frac{3n_s^2}{2|\epsilon'_m|} \right) \kappa_s \right\} \quad (\text{S2}) \\ &\equiv \frac{\omega}{c} \left( \frac{n_s^3 \epsilon''_m}{2\epsilon'^2_m} + \kappa_s \right) \end{aligned}$$

On the other hand, approximations of  $k''_R$  in Eq 20 are given by

$$\begin{aligned}
k_R'' &\cong \frac{\omega}{c} \sin \phi \left( \frac{2}{|\epsilon'_m| + n_s^2} \right) \left( \frac{|\epsilon'_m| n_s^2}{|\epsilon'_m| - n_s^2} \right)^{3/2} \cdot \exp \left[ -\frac{4\pi d}{\lambda} \frac{|\epsilon'_m|}{(|\epsilon'_m| - n_s^2)^{1/2}} \right] \\
&\cong \frac{\omega}{c} \sin \phi \frac{2n_s^3}{|\epsilon'_m|} \left( 1 + \frac{n_s^2}{2|\epsilon'_m|} - \frac{3n_s^4}{2\epsilon_m'^2} \right) \cdot \exp \left[ -\frac{4\pi d}{\lambda} \sqrt{|\epsilon'_m|} \left( 1 + \frac{n_s^2}{2|\epsilon'_m|} \right) \right] \quad (\text{S3}) \\
&\cong \frac{\omega}{c} \sin \phi \frac{2n_s^3}{|\epsilon'_m|} \cdot \exp \left[ -\frac{4\pi d}{\lambda} \sqrt{|\epsilon'_m|} \left( 1 + \frac{n_s^2}{2|\epsilon'_m|} \right) \right]
\end{aligned}$$

with

$$\exp(i\phi) \equiv [r_{pm}]_{k_x=k_0} = \frac{A + iB}{A - iB}, \quad (\text{S4})$$

$$A = \epsilon_m \sqrt{\epsilon_p - \frac{\epsilon_m \epsilon_s}{\epsilon_m + \epsilon_s}}, \quad (\text{S5})$$

and

$$B = -\epsilon_p \sqrt{-\frac{\epsilon_m^2}{\epsilon_m + \epsilon_s}}. \quad (\text{S6})$$

It is noted that Eqs S4 to S6 are equivalent to

$$\tan \frac{\phi}{2} = \frac{B}{A} \equiv \frac{\epsilon_p}{\sqrt{\{|\epsilon'_m|(\epsilon_p - \epsilon'_s) - \epsilon_p \epsilon'_s\}}}. \quad (\text{S7})$$

Eqs. S2 and S3 finally give the approximated value of  $\eta$  as follows

$$\eta = \frac{k_0''}{k_R''} \equiv \frac{\epsilon_m''}{4|\epsilon'_m| \sin \phi} \left( 1 + \frac{2\epsilon_m'^2}{n_s^3 \epsilon_m''} \kappa_s \right) \exp \left[ \frac{4\pi d}{\lambda} \sqrt{|\epsilon'_m|} \left( 1 + \frac{n_s^2}{2|\epsilon'_m|} \right) \right]. \quad (\text{25})$$
